# Supplementary material
Source: Research Square preprint supplement (doi:10.21203/rs.3.rs-10341516/v1)
Supplement: Supplementary file 1 [file b40b4ec5757092def6d496ad.docx]

Appendix A. **Variables used in the fixed-effects regression analysis.**

| **Variable** | **Source** | **Description** |
| --- | --- | --- |
| Altitude_class | ISTAT - classificazione statistiche 2024 | 1=Mountain; 3=Hills; 5=Lowland.  Mountain refers to territories located 600 meters above sea level, while hills are considered between 300 and 600 meters above sea level. Municipalities consisting in more than one altimetric zone are classified into a single one, using the criterion of prevalence of surface area. |
| Altitude_avg | ISTAT - Principali statistiche geografiche sui comuni | Average altitude in meters. |
| COD_SLL_2011_2018_T | ISTAT - sistemi locali di lavoro 2011 | 2011 Local Labour System Code – 2018 version.  Labour market areas (LMAs, “local labour systems” – “SLL” in Italian) are sub-regional geographical areas where the bulk of the labour force lives and works, and where establishments can find the largest amount of the labour force necessary to occupy the offered jobs. LMAs are defined on a functional basis, the key criterion being the proportion of commuters who cross the LMA boundary on their way to work. LMAs are developed through an allocation process based on the analysis of commuting patterns.  This classification is included as ISTAT does not have unemployment data at the municipality level, but it provides data from 2006 for each local labour system. Hence, the corresponding unemployment rate was used as a proxy for each municipality in the sample. |
| Unemployment | ISTAT- sistemi locali di lavoro | Percentage ratio between the unemployed of a given age group (15 years and over) and the total number of employed and unemployed people (labor force) of the same age group. |
| Population | CMTO Statistics Office | Absolute number of total inhabitants per municipality. |
| Female_percentage | CMTO Statistics Office | Percentage ratio of total female population over total population. |
| Pop_18 | CMTO Statistics Office | Percentage ratio of total population under 18 years old over total population. |
| Pop_65 | CMTO Statistics Office | Percentage ratio of total population over 64 years old over total population. |
| Non-Italian | CMTO Statistics Office | Percentage ratio of non-Italian population over total population. |
| km_tot_TO | ISTAT - Matrici di contiguità, distanza e pendolarismo | Distance from each municipality to the city of Turin in km. |
| Rent | Agenzia delle Entrate - OSSERVATORIO DEL MERCATO IMMOBILIARE | Average rent price in EUROS per square metre of "abitazioni civili" – residential buildings intended for standard housing purposes, typically categorised under ordinary residential use (as opposed to luxury properties or social housing). |
| Income_per_capita | Ministero dell'Economia e delle Finanze - Dipartimento delle Finanze | Total taxable income in EUROS (Reddito imponibile - Ammontare in euro) per number of taxpayers (Numero di contribuenti). |
| Temperature_anomaly | Copernicus - ERA5 monthly averaged data on single levels from 1940 to present | Summer temperature anomalies in °C (year vs 1970-2000) - summer months: June, July, August. |
| Precipitation_anomaly | Copernicus - ERA5 monthly averaged data on single levels from 1940 to present | Summer total precipitation anomalies in mm (year vs 1970-2000) - summer months: June, July, August. |
| Humidity_anomaly | Copernicus - ERA5 monthly averaged data on pressure levels from 1940 to present (Relative humidity – 950 hPa) | Summer relative humidity anomalies in % (year vs 1970-2000) - summer months: June, July, August. |
| Discomfort_index | Copernicus - ERA5 monthly averaged data on pressure levels from 1940 to present (Relative humidity – 950 hPa; Temperature at 2m) | The discomfort index, proposed by Thom E.C. (1959) and Bosen J.F. (1960), is calculated using air temperature (T) and relative humidity (RH) to estimate thermal stress on humans. Commonly expressed as DI = T - (0.55 - 0.0055 × RH) × (T - 14.5), it is used to assess heat discomfort levels, where values above 24°C indicate moderate discomfort and those above 27°C signify severe heat stress (ARPA Piemonte, 2025). |

Appendix B**. Regression Diagnostics and Model Specification Tests.**

Table A. F-test results for Fixed-Effects regression model with lagged variables.

|  | **F_statistic** | **df1** | **df2** | **p_value** | **Decision** |
| --- | --- | --- | --- | --- | --- |
| **All municipalities** | 2.093 | 304 | 4,831 | <0.001 | Reject H0 (FE preferred) |
| **Mountainous** | 1.736 | 101 | 1,620 | <0.001 | Reject H0 (FE preferred) |
| **Hills** | 2.776 | 121 | 1,940 | <0.001 | Reject H0 (FE preferred) |
| **Lowlands** | 4.122 | 80 | 1,247 | <0.001 | Reject H0 (FE preferred) |

Table B. Hausman test results for Fixed-Effects regression model with lagged variables.

|  | **Chi2** | **df** | **p_value** | **Decision** |
| --- | --- | --- | --- | --- |
| **All municipalities** | 213.950 | 12 | <0.001 | Reject H0 (FE preferred) |
| **Mountainous** | 71.432 | 12 | <0.001 | Reject H0 (FE preferred) |
| **Hills** | 106.600 | 12 | <0.001 | Reject H0 (FE preferred) |
| **Lowlands** | 128.616 | 12 | <0.001 | Reject H0 (FE preferred) |

Table C. Wooldridge test for Fixed-Effects regression model with lagged variables.

|  | **F_statistic** | **df1** | **df2** | **p_value** | **Decision** |
| --- | --- | --- | --- | --- | --- |
| **All municipalities** | 0.700 | 1 | 4,841 | 0.403 | Fail to reject H0 (No serial correlation) |
| **Mountainous** | 0.664 | 1 | 1,630 | 0.415 | Fail to reject H0 (No serial correlation) |
| **Hills** | 0.008 | 1 | 1,950 | 0.930 | Fail to reject H0 (No serial correlation) |
| **Lowlands** | 0.249 | 1 | 1,257 | 0.618 | Fail to reject H0 (No serial correlation) |

| **Fixed-Effects Model - Variance Inflation Factors (VIF) results** | | | |  |
| --- | --- | --- | --- | --- |
| Variable | **Model** | **Mountains** | **Hills** | **Lowlands** |
| Temperature Anomaly | 2.721176 | 2.159554 | 3.611976 | 4.480173 |
| Precipitation Anomaly | 1.974498 | 1.900889 | 1.975924 | 2.566003 |
| Humidity Anomaly | 2.80161 | 2.700961 | 2.854683 | 3.411886 |
| Unemployment (%) | 1.414024 | 1.534684 | 1.425731 | 1.529827 |
| Population | 1.380793 | 1.263998 | 1.52299 | 2.246761 |
| Female population (%) | 1.183825 | 1.181302 | 1.204274 | 1.458821 |
| Population <18 (%) | 2.378811 | 1.879771 | 1.964843 | 2.09065 |
| Population >65 (%) | 2.495487 | 2.216956 | 2.14186 | 3.040949 |
| Foreigners (%) | 1.100617 | 1.375738 | 1.188054 | 1.228783 |
| Rent | 1.815448 | 1.834341 | 2.307235 | 2.953703 |
| Income per capita | 1.540381 | 1.509764 | 1.493896 | 2.039103 |
| Discomfort Index | 1.732605 | 1.394872 | 1.671511 | 2.006967 |

| **Fixed-Effects Model with lagged variables - Variance Inflation Factors (VIF) results** | | | | |
| --- | --- | --- | --- | --- |
| Variable | **Model** | **Mountains** | **Hills** | **Lowlands** |
| Temperature Anomaly | 2.983399 | 2.410696 | 3.781628 | 4.686034 |
| Temperature Anomaly (lag1) | 1.89303 | 1.705296 | 2.097277 | 2.349967 |
| Precipitation Anomaly | 2.028435 | 1.91369 | 2.076362 | 2.798828 |
| Precipitation Anomaly (lag1) | 2.008156 | 1.899827 | 2.059647 | 2.72374 |
| Humidity Anomaly | 3.0186 | 2.812382 | 3.123113 | 4.106968 |
| Humidity Anomaly (lag1) | 2.441578 | 2.363106 | 2.517118 | 3.043575 |
| Unemployment (%) | 1.724952 | 1.811595 | 1.828293 | 1.908384 |
| Population | 1.385897 | 1.267925 | 1.530889 | 2.292129 |
| Female population (%) | 1.195811 | 1.188442 | 1.217204 | 1.487828 |
| Population <18 (%) | 2.389907 | 1.888769 | 1.979963 | 2.15041 |
| Population >65 (%) | 2.527929 | 2.231561 | 2.195664 | 3.26046 |
| Foreigners (%) | 1.112333 | 1.395646 | 1.195704 | 1.28979 |
| Rent | 1.847548 | 1.88235 | 2.389328 | 3.069849 |
| Income per capita | 1.607971 | 1.609141 | 1.57852 | 2.183788 |
| Discomfort Index | 1.784422 | 1.494799 | 1.702367 | 2.026551 |

| **Pooled OLS Model - Variance Inflation Factors (VIF) results** | | | |  |
| --- | --- | --- | --- | --- |
| Variable | **Model** | **Mountains** | **Hills** | **Lowlands** |
| Temperature Anomaly | 3.061716 | 2.426056 | 3.796207 | 4.704035 |
| Temperature Anomaly (lag1) | 1.89485 | 1.707392 | 2.107073 | 2.350746 |
| Precipitation Anomaly | 2.029743 | 1.913899 | 2.076422 | 2.898315 |
| Precipitation Anomaly (lag1) | 2.009658 | 1.899853 | 2.069483 | 2.724639 |
| Humidity Anomaly | 3.06751 | 2.817523 | 3.205839 | 4.128342 |
| Humidity Anomaly (lag1) | 2.479976 | 2.3785 | 2.58613 | 3.120525 |
| Unemployment (%) | 1.862824 | 1.929451 | 2.077318 | 2.249004 |
| Population | 1.534645 | 1.387903 | 1.531524 | 2.504927 |
| Female population (%) | 1.214555 | 1.228298 | 1.21732 | 1.499056 |
| Population <18 (%) | 2.459327 | 1.930467 | 1.988029 | 2.164699 |
| Population >65 (%) | 2.575616 | 2.291149 | 2.320783 | 3.397095 |
| Foreigners (%) | 1.199561 | 1.419864 | 1.220927 | 1.322602 |
| Rent | 1.873654 | 2.273614 | 2.861966 | 3.25331 |
| Income per capita | 1.683781 | 1.609189 | 1.710248 | 2.347598 |
| Distance to Turin | 2.531698 | 1.914457 | 2.63201 | 2.597669 |
| Discomfort Index | 2.206541 | 1.570355 | 1.862447 | 2.03488 |
